# Supplementary material for: Comparison study on separation of morin: ultrasound assisted molecularly imprinted polymeric nanoparticles-solid phase extractionversussolidification of floating organic-drop assisted dispersive liquid–liquid microextraction
Source: Royal Society of Chemistry journal article supplement (doi:10.1039/c7nj01764b), 2017-01-01
Supplement: c7nj01764b1.pdf [file c7nj01764b1.pdf]

## Electronic Supplementary Material

### Graphene quantum dots as novel and green nano-materials for the visible-light-driven photocatalytic degradation of cationic dye

Mahmoud Roushani<sup>a,\*</sup>, Maryamosadat Mavaei<sup>a</sup>, Hamid Reza Rajabi<sup>b,\*</sup>

<sup>a</sup>*Department of Chemistry, Ilam University, Ilam, Iran*

<sup>b</sup>*Chemistry Department, Yasouj University, Yasouj, 75918-74831, Iran*

---

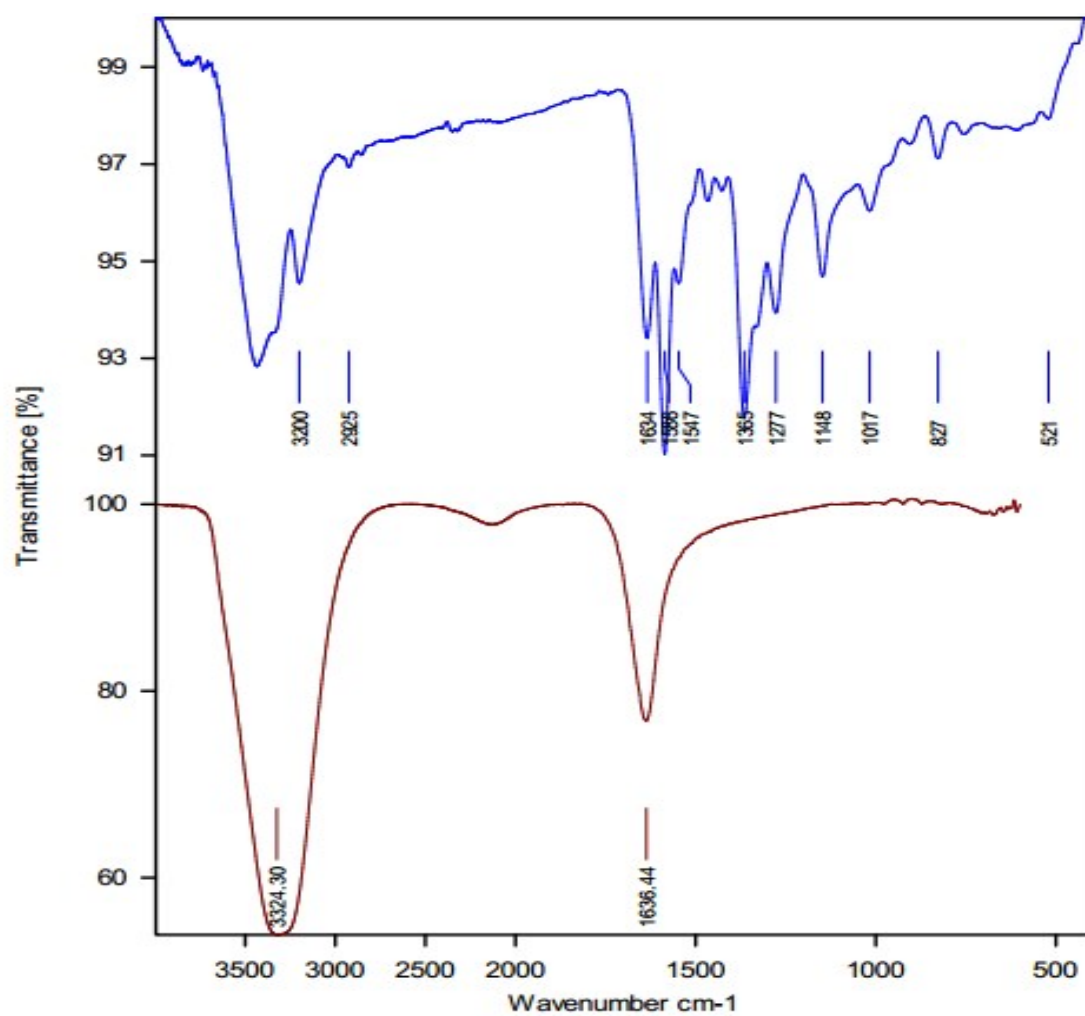

Fig. S1. IR spectra of (a) Initial NF, (b) NF after degradation.

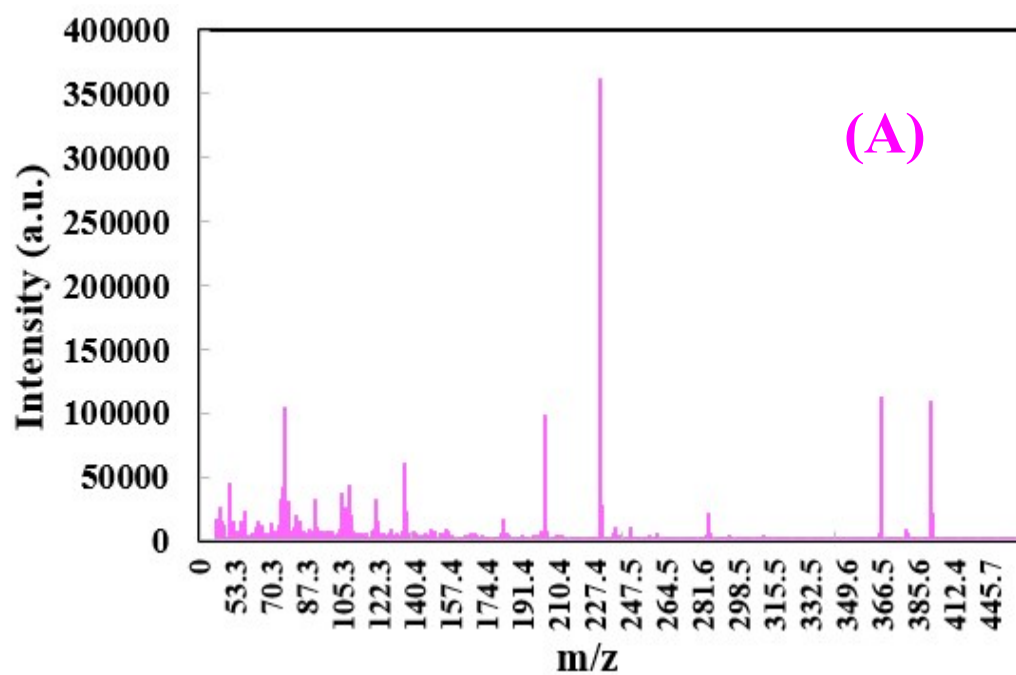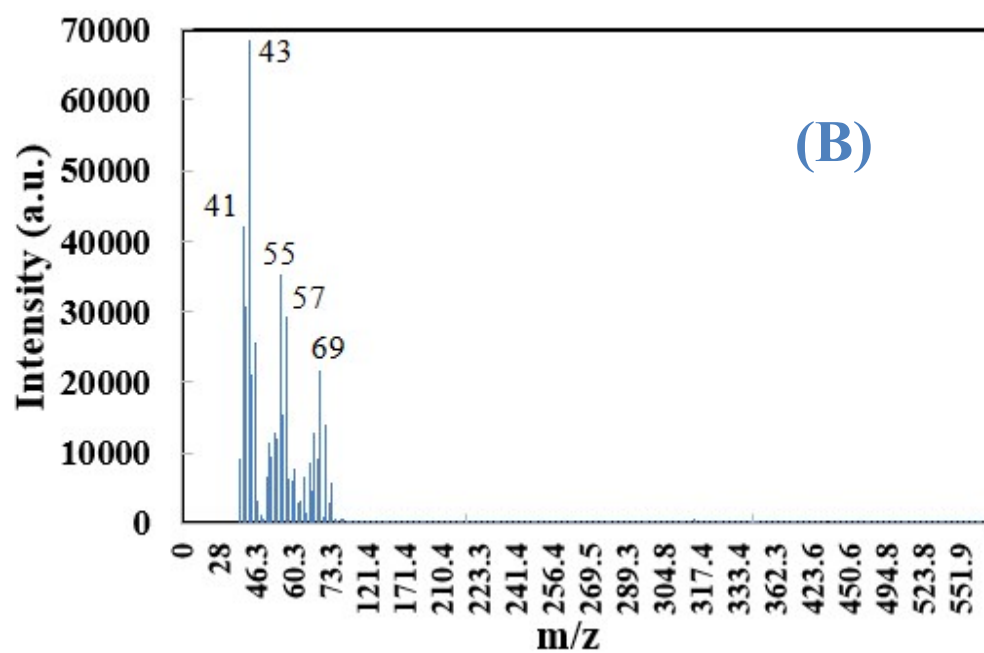

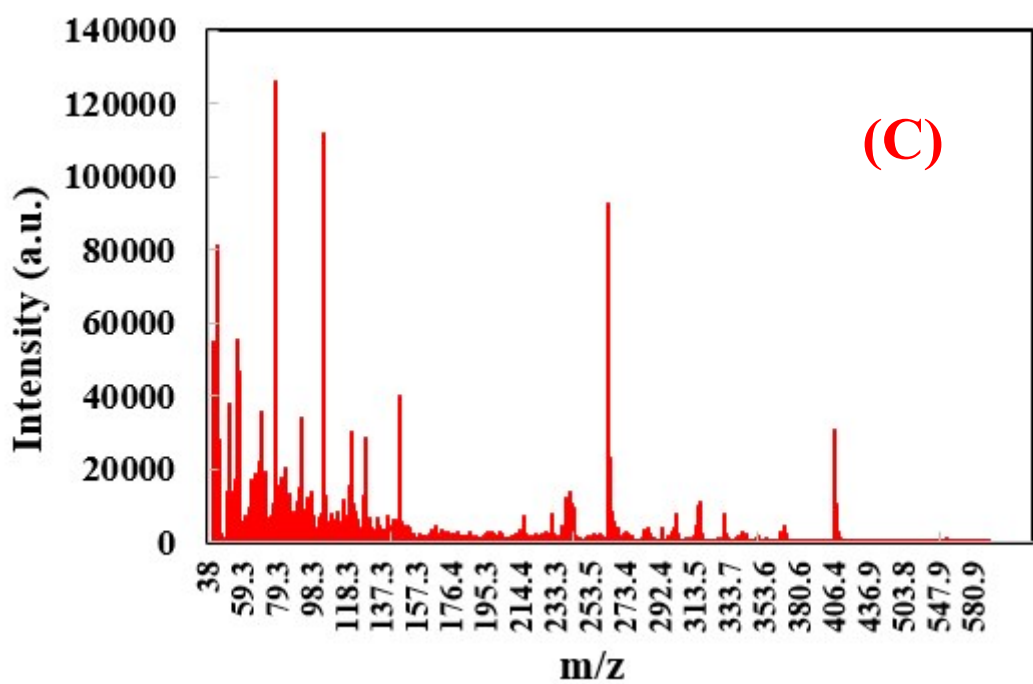

Fig. S2. Mass spectra of NF (A) before, (B) after degradation and (C) mass spectrum of GQDs.

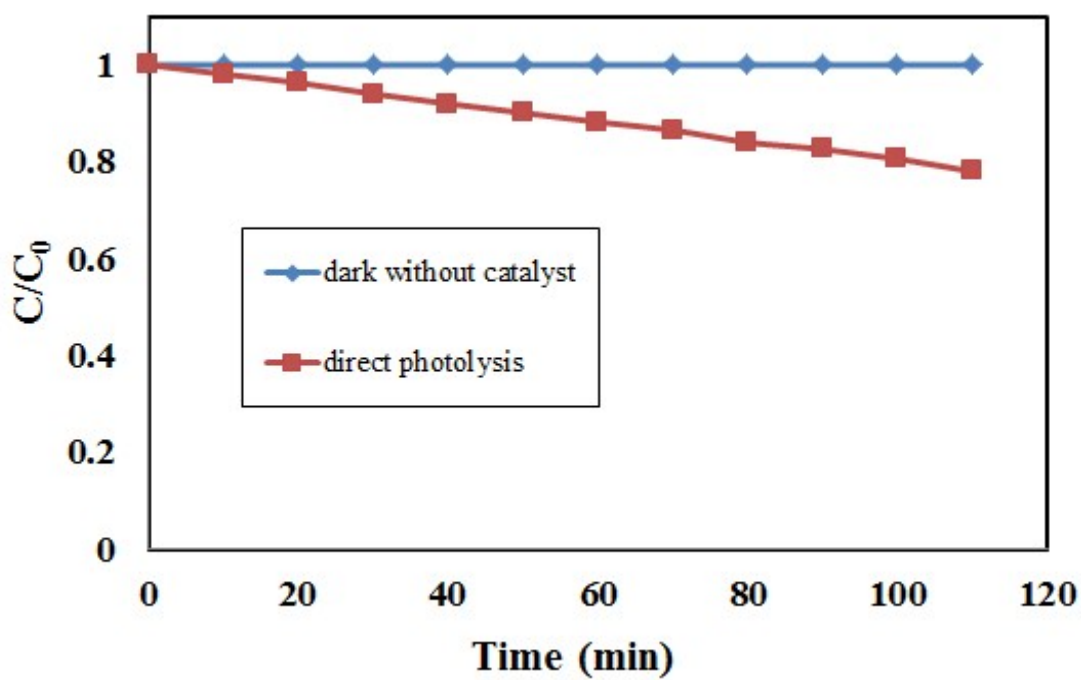

Fig. S3. Degradation of NF under irradiation of visible-light without adding any GQDs, dark without catalyst, and direct photocatalysis.
